# Supplementary material
Source: Springer Nature journal article supplement (https://www.springermedizin.de/resource/supplementary/12865_2013_563_MOESM6_ESM.pdf/9428296)

**A**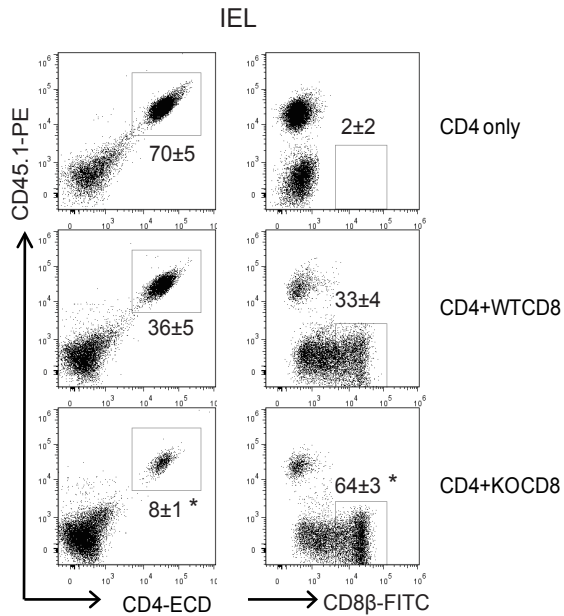**B**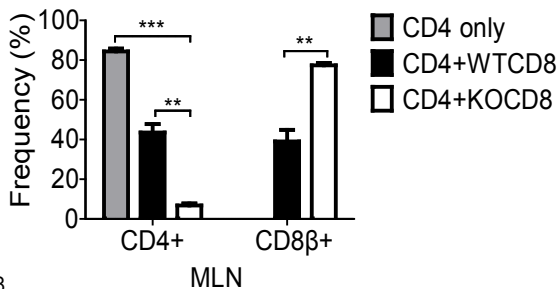**C**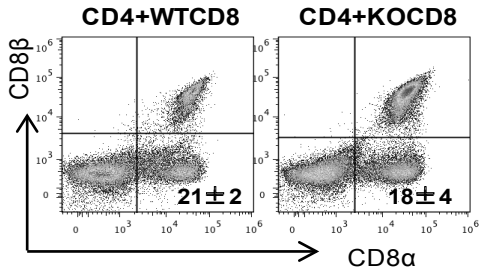

Supplement: MOESM6 [file 9428296]
